# Supplementary material for: The amelioration of cartilage degeneration by photo-crosslinked GelHA hydrogel and crizotinib encapsulated chitosan microspheres
Source: PubMed Central journal article supplement (PMC5444739; doi:10.18632/oncotarget.15750), 2017-02-27
Supplement: oncotarget-08-30235-s001.pdf [file oncotarget-08-30235-s001.pdf]

# The amelioration of cartilage degeneration by photo-crosslinked GelHA hydrogel and crizotinib encapsulated chitosan microspheres

## SUPPLEMENTARY FIGURES

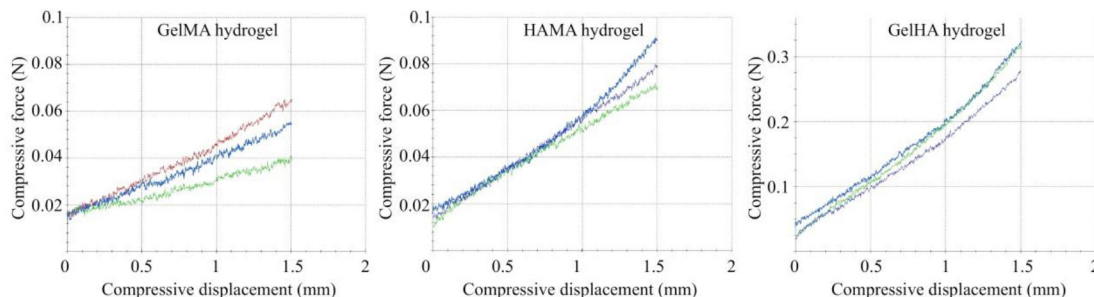

Supplementary Figure 1: Load-displacement curves of the hydrogels.

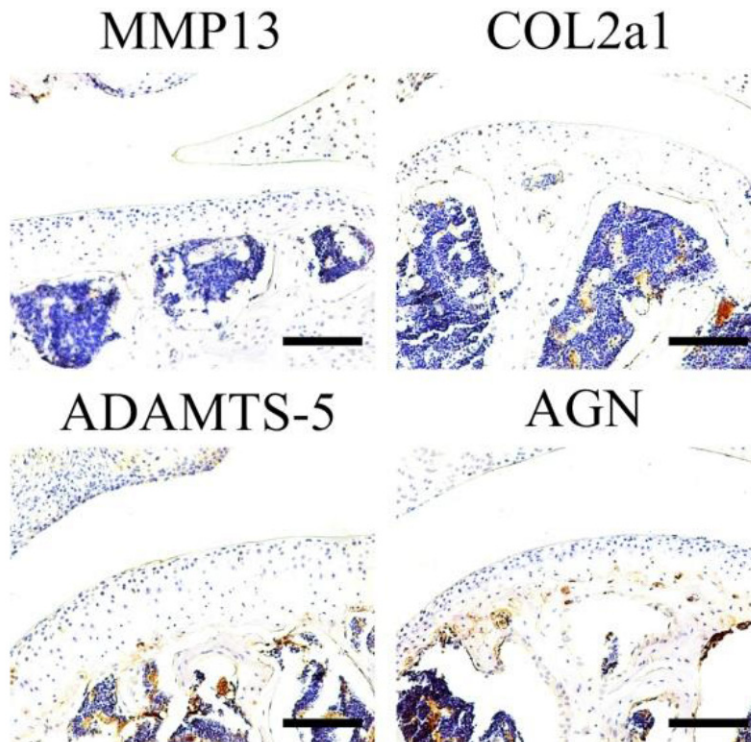

Supplementary Figure 2: Negative controls of MMP-13, COL2A1, ADAMTS-5, aggrecan. Scale bars = 100  $\mu$ m.
